# Supplementary material for: A facile template-free route to fabricate highly luminescent mesoporous gadolinium oxides
Source: Royal Society of Chemistry journal article supplement (doi:10.1039/c1ce05435j), 2011-01-01
Supplement: c1ce05435j.pdf [file c1ce05435j.pdf]

## Electronic Supplementary Information

-----

### **A facile template-free route to fabricate highly luminescent mesoporous gadolinium oxides**

**Weihua Di, Xinguang Ren, Ligong Zhang and Shaozhe Lu**

Key Laboratory of Excited-state Processes, Changchun Institute of Optics, Fine Mechanics and Physics, Chinese Academy of Sciences, 3888 Eastern South Lake Road, Changchun 130033, P. R. China.

#### **Experimental sections**

**Preparation of  $\text{Gd}(\text{OH})\text{CO}_3\cdot\text{H}_2\text{O}$ .** The monodisperse  $\text{Gd}(\text{OH})\text{CO}_3\cdot\text{H}_2\text{O}$  colloidal nanoparticles were prepared via a urea-based homogeneous precipitation process. A total of 5 mL of  $\text{Gd}(\text{NO}_3)_3$  (1 M) and 10 g of urea [ $\text{CO}(\text{NH}_2)_2$ ] were dissolved in deionized water. The total volume of the solution was about 250 mL. The above solution was first homogenized under magnetic stirring at room temperature for 2 h. The resultant solution was then reacted at 85 °C for 2.5 h in an oil bath. The obtained suspension was separated by centrifugation and collected after washing with deionized water and ethanol several times.  $\text{Eu}^{3+}$ -doped samples were obtained under the same conditions by replacing a fraction of  $\text{Gd}(\text{NO}_3)_3$  by  $\text{Eu}(\text{NO}_3)_3$ .

**Preparation of mesoporous  $\text{Gd}_2\text{O}_3\cdot\text{Eu}$ .** Mesoporous gadolinium oxides ( $\text{Gd}_2\text{O}_3$ ) were obtained by heating the as-prepared  $\text{Gd}(\text{OH})\text{CO}_3\cdot\text{H}_2\text{O}\cdot\text{Eu}$  at 750 °C for 2 h with a heating rate of 2 °C  $\text{min}^{-1}$ .

#### **Characterizations**

The X-ray powder diffraction (XRD) data were collected on an X'Pert MPD Philips diffractometer (CuK $\alpha$  X-radiation at 40 kV and 50 mA) in the 2 $\theta$  range from 10° to 70° with

a scanning step of 0.02°. The transmission electron microscopy (TEM) observations were carried out using a JEOL 2200FS microscope. Samples for TEM investigations were prepared by first dispersing the particles in ethanol under assistance of ultrasonification and then dropping 1 drop of the suspension on a copper TEM grid coated with a holey carbon film. Fourier transform infrared (FT-IR) spectra (Mattson 5000) of the samples were measured in the range of 4000-500  $\text{cm}^{-1}$  in transmission mode. The pellets were prepared by adding 0.8 mg of the sample powder to 80 mg of KBr. The powders were mixed homogeneously and compressed at a pressure of 10 KPa to form transparent pellets. Thermogravimetric analysis (TGA) of the as-prepared precursor was performed using a thermoanalyzer (Thermo Plus TG 8120, Rigaku). The data were recorded at a scan rate of 5  $^{\circ}\text{C min}^{-1}$  from room temperature to 800  $^{\circ}\text{C}$  in air. The  $\text{N}_2$  adsorption-desorption isotherms were recorded at 77 K on a Micromeritics ASAP 2010. The samples were degassed at 523 K and  $10^{-6}$  Torr for 10 h prior to measurement. The fluorescence spectra were recorded on a fluorescence spectrophotometer (F-7000, Hitachi) at room temperature. The slit widths of the excitation and emission were both 1.0 nm. The luminescence quantum yield was taken on Fluorescence SENS-9000 PL calibrated spectrometer equipped with an integrated sphere. Three measurements were made for each sample and the average value is reported. The method is accurate to within 5%.

The elemental analysis quantifies the elemental components (mass %) of the as-prepared precursor. Elemental contents of the dried particles analyzed by the inductively coupled plasma (ICP) spectrophotometric method were listed in Table S1, yielding a (Gd+Eu):C:O molar ratio of about 1:1.01:5.10. Assuming that all the carbon was from  $\text{CO}_3^{2-}$  and considering molecular neutrality, the chemical formula of the as-prepared product may be expressed as  $\text{Gd}(\text{OH})\text{CO}_3 \cdot \text{H}_2\text{O} \cdot \text{Eu}$ . The results are consistent with the pioneering work of Matijevic *et al.* and the recent work by Lechevallier's group.

**Table 1.** Elemental content of as-prepared particles (mass %).

| Gd    | Eu   | C    | O     |
|-------|------|------|-------|
| 58.2% | 3.7% | 4.8% | 31.6% |

The FT-IR spectrum provides the insight into the chemical composition of the as-prepared precursor (Figure S1). A strong and broad absorption bands peaking at  $3400\text{ cm}^{-1}$  and a shoulder located at  $1645\text{ cm}^{-1}$  are the characteristic absorption of water of hydration in the structure or surface adsorbed water and hydroxyl groups (OH).<sup>1</sup> The presence of carbonate anions in the molecular structure was confirmed by the appearance of absorption doublets in the region  $1350\text{--}1600\text{ cm}^{-1}$  ( $\nu_3$  of  $\text{CO}_3^{2-}$ , peaking at  $\sim 1408$  and  $1504\text{ cm}^{-1}$ ) and also by the occurrence of multiple absorptions ranging from  $500$  to  $1000\text{ cm}^{-1}$  ( $\nu_2$  and  $\nu_4$  of  $\text{CO}_3^{2-}$ ).<sup>2,3</sup> Upon calcination at  $550^\circ\text{C}$ , the characteristic absorptions of hydration water and hydroxyl groups almost disappear completely (Figure S1(b)), compared to that of the as-prepared  $\text{Gd}(\text{OH})\text{CO}_3\cdot\text{H}_2\text{O}$ . This indicates the occurrence of the dehydration in the temperature ranging from  $200$  to  $550^\circ\text{C}$ . Further calcination up to  $800^\circ\text{C}$ , the characteristic absorptions of  $\text{CO}_3^{2-}$  disappear due to the release of  $\text{CO}_2$  molecules, and a new peak around  $560\text{ cm}^{-1}$  was observed, which is the characteristic vibration of Gd-O bond of  $\text{Gd}_2\text{O}_3$ . Therefore, a two-step thermal decomposition process finally leads to the formation of a new product, that is, gadolinium oxides  $\text{Gd}_2\text{O}_3$ , as revealed also by XRD.

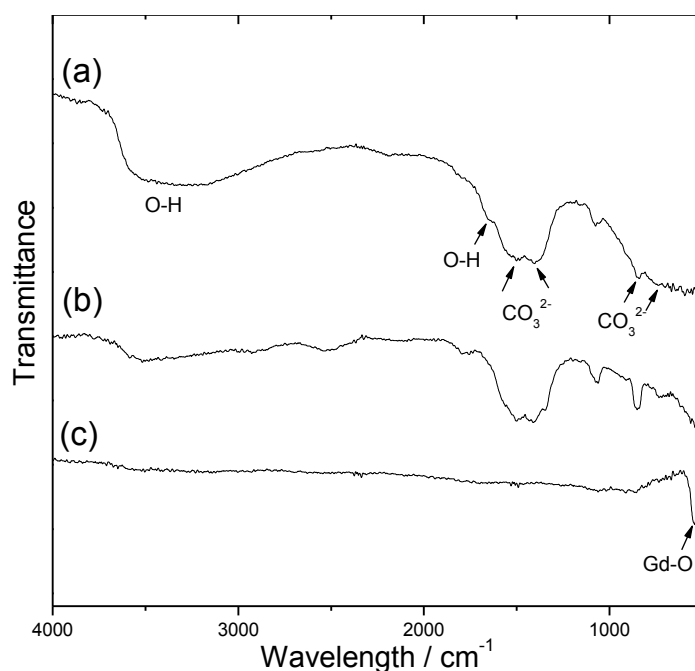

**Figure S1.** FT-IR spectra of the as-prepared  $\text{Gd}(\text{OH})\text{CO}_3\cdot\text{H}_2\text{O}:\text{Eu}$  (a) and the samples calcinated at  $550^\circ\text{C}$  (b) and  $750^\circ\text{C}$  (c), respectively.

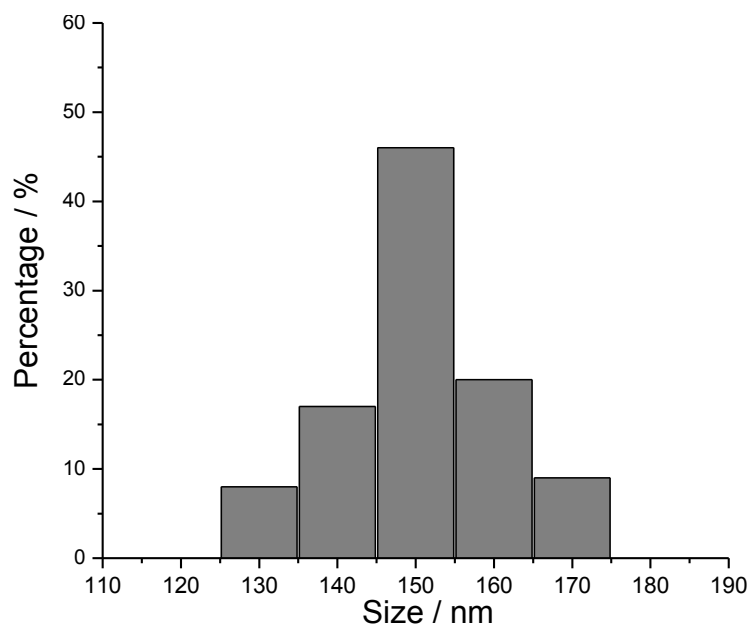

**Figure S2.** The size distribution plot of as-prepared Gd(OH)CO<sub>3</sub>·H<sub>2</sub>O:Eu particles based on the analysis of 100 particles from TEM observations

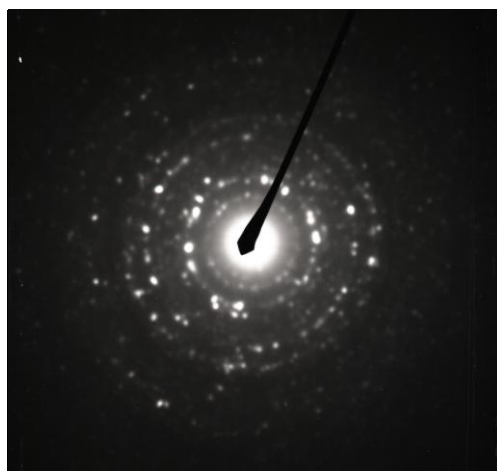

**Figure S3.** Electron diffraction pattern of mesoporous Gd<sub>2</sub>O<sub>3</sub>:Eu.

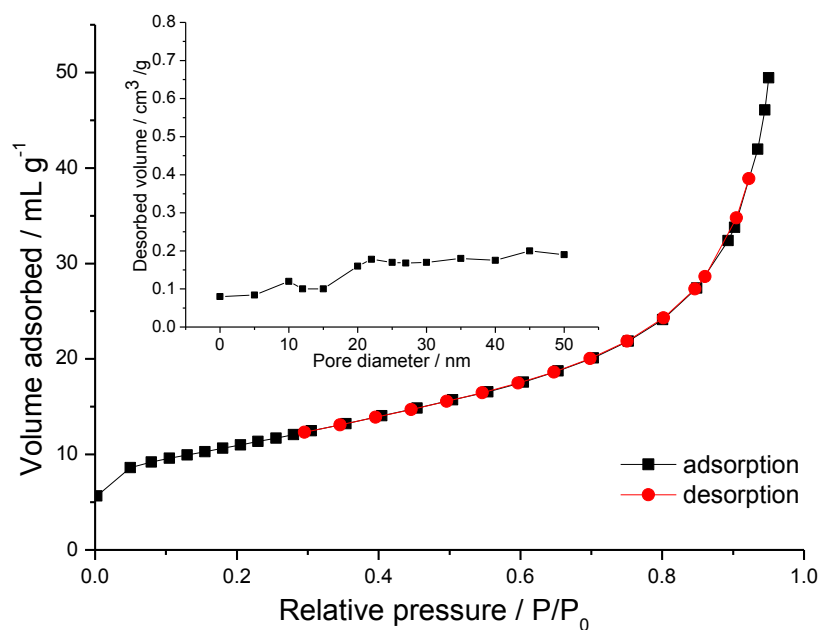

**Figure S4.** Nitrogen adsorption-desorption isotherms of as-prepared precursor Gd(OH)CO<sub>3</sub>·H<sub>2</sub>O:Eu. The inset shows the corresponding pore diameter distribution curve.

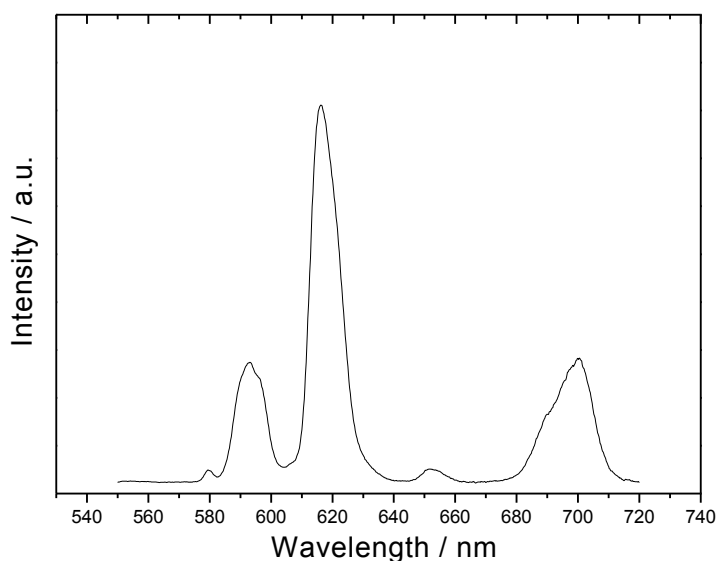

**Figure S5.** Emission spectrum of as-prepared Gd(OH)CO<sub>3</sub>·H<sub>2</sub>O:Eu upon excitation at 254 nm.

## References

1. L. Moscardini d'Assuncao, I. Giolito and M. Ionashiro, *Thermochim. Acta* 1989, **137**, 319.
2. W. Matijevic and W. Hsu, *J. Colloid. Interface Sci.* 1987, **118**, 506.
3. K. Makamoto, *Infrared spectra of inorganic and coordination compounds*. New York: John Wiley & Sons; 1963.
